## Correction

**Correction: AKR1B10 promotes breast cancer cell migration and invasion via activation of ERK signaling****Jia Li<sup>1,\*</sup>, Yuanwei Guo<sup>1,2,\*</sup>, Lili Duan<sup>1,\*</sup>, Xinglin Hu<sup>1,\*</sup>, Xi Zhang<sup>1,3</sup>, Jian Hu<sup>1,2</sup>, Li Huang<sup>1,2</sup>, Rongzhang He<sup>1</sup>, Zheng Hu<sup>1</sup>, Weihao Luo<sup>1</sup>, Tan Tan<sup>1,2</sup>, Renbin Huang<sup>1</sup>, Duanfang Liao<sup>1,4</sup>, Yuan-Shan Zhu<sup>5</sup> and Di-Xian Luo<sup>1,2</sup>**

<sup>1</sup>Translational Medicine Institute, National & Local Joint Engineering Laboratory for High-throughput Molecular Diagnosis Technology, Affiliated to The First People's Hospital of Chenzhou, University of South China, Chenzhou 423000, P.R. China

<sup>2</sup>Center for Clinical Pathology, Affiliated to The First People's Hospital of Chenzhou 423000, P.R. China

<sup>3</sup>Department of Neurology, Affiliated to The First People's Hospital of Chenzhou 423000, P.R. China

<sup>4</sup>School of Pharmacy, Hunan University of Chinese Medicine, Changsha 410208, P.R. China

<sup>5</sup>Department of Clinical Pharmacology, Xiangya Hospital and Institute of Clinical Pharmacology, Central South University and Hunan Key Laboratory of Pharmacogenetics, Changsha, Hunan 410078, P.R. China

\*These authors have contributed equally to this work

**Published:**

**Copyright:** © 2022 Li et al. This is an open access article distributed under the terms of the [Creative Commons Attribution License](#) (CC BY 3.0), which permits unrestricted use, distribution, and reproduction in any medium, provided the original author and source are credited.

**This article has been corrected:** Within Figure 5, several images are accidental duplicates. In Figure 5C, the MCF-7/V 'Control' image duplicates the MCF-7/A 'PD98059' image. Also in Figure 5C, the MCF-7/A 'Control' image duplicates the siRNA 'Control' image in Figure 5E. Finally, the MCF-7/V 'PD98059' image in Figure 5C duplicates the siRNA 'PD98059' image in Figure 5E. The corrected Figure 5, obtained using the original data, is shown below. The authors declare that these corrections do not change the results or conclusions of this paper.

Original article: Oncotarget. 2017; 8:33694–33703. <https://doi.org/10.18632/oncotarget.16624>

### A Wound healing of MCF-7 cells by ERK inhibitor

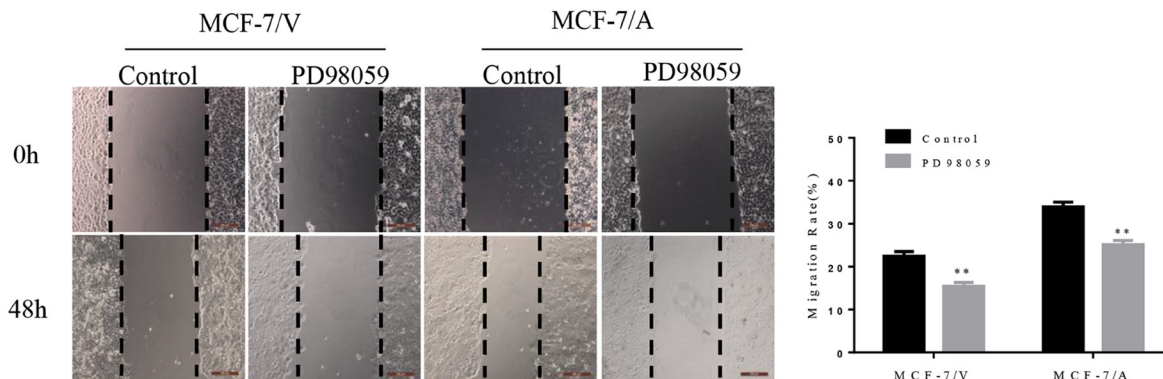

### B Migration of MCF-7 cells by ERK inhibitor

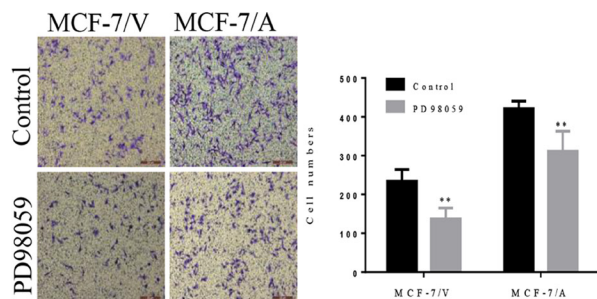

### C Invasion of MCF-7 cells by ERK inhibitor

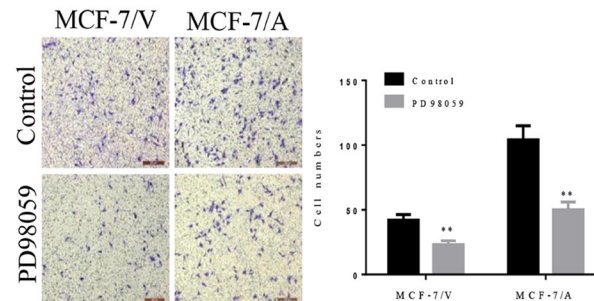

### D Migration of BT-20 cells by ERK inhibitor

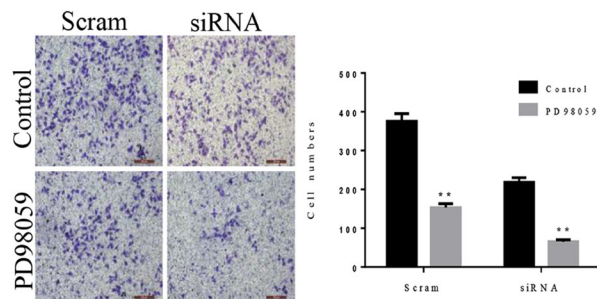

### E Invasion of BT-20 cells by ERK inhibitor

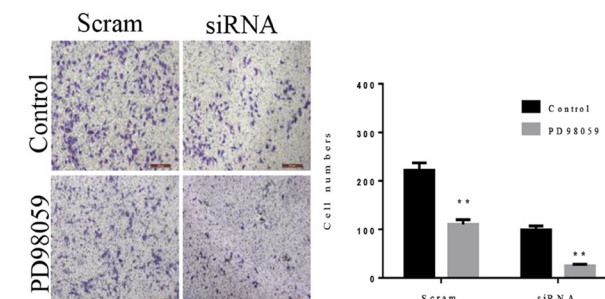

**Figure 5: AKR1B10 promotes the migration and invasion of MCF-7 cells by ERK signaling pathway.** (A) AKR1B10-induced migration of MCF-7/AKR1B10 cells was inhibited by ERK inhibitor PD98059 by wound healing assay. (B) AKR1B10-induced migration of MCF-7/AKR1B10 cells was inhibited by ERK inhibitor PD98059 by transwell migration assay without matrigel. (C) AKR1B10-induced invasion of MCF-7/AKR1B10 cells was inhibited by ERK inhibitor PD98059 by transwell invasion assay with matrigel. (\*\* $p < 0.01$ , compared to MCF-7 cells with AKR1B10 expression or with a vector control). (D) Migration of BT-20 cells was inhibited by ERK inhibitor PD98059 by transwell migration assay without matrigel. (E) Invasion of BT-20 cells was inhibited by ERK inhibitor PD98059 by transwell invasion assay with matrigel (\*\* $p < 0.01$ , compared to BT-20 cells with AKR1B10 expression or with AKR1B10-siRNA control). Cell were counted after staining with 0.1% crystal violet. Scale bar = 200  $\mu$ m. Representative images are shown on the left panel, and the statistical graphs on the right panel indicating the average number of cells per field.
